# Supplementary material for: Understanding the Politics of Food Regulation and Public Health: An Analysis of Codex Standard-Setting Processes on Food Labelling
Source: PubMed Central journal article supplement (PMC11549567; doi:10.34172/ijhpm.8310), 2024-10-14
Supplement: ijhpm-13-8310-s001.pdf [file ijhpm-13-8310-s001.pdf]

**Article title:** Understanding the Politics of Food Regulation and Public Health: An Analysis of Codex Standard-Setting Processes on Food Labelling

**Journal name:** International Journal of Health Policy and Management (IJHPM)

**Authors' information:** Monique Boatwright<sup>1\*</sup>, Mark Lawrence<sup>2</sup>, Angela Carriedo<sup>3</sup>, Scott Slater<sup>4</sup>, David McCoy<sup>5</sup>, Tanita Northcott<sup>4</sup>, Phillip Baker<sup>1</sup>

<sup>1</sup>Sydney School of Public Health, Faculty of Medicine and Health, University of Sydney, Sydney, NSW, Australia.

<sup>2</sup>Institute for Physical Activity and Nutrition, School of Exercise and Nutrition Science, Deakin University, Geelong, VIC, Australia.

<sup>3</sup>Department of Health, University of Bath, Bath, UK.

<sup>4</sup>School of Exercise and Nutrition Science, Deakin University, Geelong, VIC, Australia.

<sup>5</sup>International Institute for Global Health, United Nations University, Kuala Lumpur, Malaysia.

**\*Correspondence to:** Monique Boatwright; Email: [monique.boatwright@sydney.edu.au](mailto:monique.boatwright@sydney.edu.au)

**Citation:** Boatwright M, Lawrence M, Carriedo A, et al. Understanding the politics of food regulation and public health: an analysis of Codex standard-setting processes on food labelling. Int J Health Policy Manag. 2024;13:8310.doi:[10.34172/ijhpm.8310](https://doi.org/10.34172/ijhpm.8310)

**Supplementary file 1.** Document Search - Inclusion and Exclusion Criteria

**Table S1.** Inclusion and exclusion criteria applied in the document search process.

| Inclusion Criteria                                                                                                                                                                               | Exclusion Criteria                                                                                                                                                                                                                            |
|--------------------------------------------------------------------------------------------------------------------------------------------------------------------------------------------------|-----------------------------------------------------------------------------------------------------------------------------------------------------------------------------------------------------------------------------------------------|
| CCFL documents (agendas, session reports, comments, CRDs, electronic working group reports, and circular letters) and 2015 CCFL documents filed under CCFL43 (n=247)                             | Documents outside of 2016-2023 (other than those under CCFL43)                                                                                                                                                                                |
| CCFL agendas, background documents, proposals, discussion papers and reviews relating to the new Guidelines for FOPNL (n=24)                                                                     | Documents under the purview of committees other than the CCFL                                                                                                                                                                                 |
| CCFL circular letters and reports referring to FOPNL (n=9)                                                                                                                                       | CCFL information documents and EWG invitation forum documents                                                                                                                                                                                 |
| CCFL comments by member state delegates and observers referring to FOPNL (n=32)                                                                                                                  | Documents not in English (n=5)                                                                                                                                                                                                                |
| CCFL comments by member state delegates and observers focused on labelling principles for 'high-in' warnings on FOPNL and FOPNL inclusion/exclusion criteria for unhealthy packaged foods (n=19) | CCFL documents referencing FOPNL for alcoholic beverages, and principles and criteria for food labelling regarding exemptions in emergencies, sustainability claims, allergens, internet sales, e-commerce, and non-retail containers (n=182) |
| Documents included (n=60)                                                                                                                                                                        |                                                                                                                                                                                                                                               |

Abbreviations: CCFL, Codex Committee on Food Labelling; CRDs, Conference Room Documents; EWG, Electronic Working Group; FOPNL, Front-of-pack Nutrition Labelling.
