# Supplementary material for: Understanding the Politics of Food Regulation and Public Health: An Analysis of Codex Standard-Setting Processes on Food Labelling
Source: PubMed Central journal article supplement (PMC11549567; doi:10.34172/ijhpm.8310), 2024-10-14
Supplement: ijhpm-13-8310-s002.pdf [file ijhpm-13-8310-s002.pdf]

**Article title:** Understanding the Politics of Food Regulation and Public Health: An Analysis of Codex Standard-Setting Processes on Food Labelling

**Journal name:** International Journal of Health Policy and Management (IJHPM)

**Authors' information:** Monique Boatwright<sup>1\*</sup>, Mark Lawrence<sup>2</sup>, Angela Carriedo<sup>3</sup>, Scott Slater<sup>4</sup>, David McCoy<sup>5</sup>, Tanita Northcott<sup>4</sup>, Phillip Baker<sup>1</sup>

<sup>1</sup>Sydney School of Public Health, Faculty of Medicine and Health, University of Sydney, Sydney, NSW, Australia.

<sup>2</sup>Institute for Physical Activity and Nutrition, School of Exercise and Nutrition Science, Deakin University, Geelong, VIC, Australia.

<sup>3</sup>Department of Health, University of Bath, Bath, UK.

<sup>4</sup>School of Exercise and Nutrition Science, Deakin University, Geelong, VIC, Australia.

<sup>5</sup>International Institute for Global Health, United Nations University, Kuala Lumpur, Malaysia.

**\*Correspondence to:** Monique Boatwright; Email: [monique.boatwright@sydney.edu.au](mailto:monique.boatwright@sydney.edu.au)

**Citation:** Boatwright M, Lawrence M, Carriedo A, et al. Understanding the politics of food regulation and public health: an analysis of Codex standard-setting processes on food labelling. Int J Health Policy Manag. 2024;13:8310.doi:[10.34172/ijhpm.8310](https://doi.org/10.34172/ijhpm.8310)

**Supplementary file 2.** Main Industry Actors Representing Member States During Deliberations Under the Codex Committee on Food Labelling (2016-2023)



**Note:** The numbers within each highlighted cell represents the number of times an industry actor participated in a member state delegation
