# Supplementary material for: Understanding the Politics of Food Regulation and Public Health: An Analysis of Codex Standard-Setting Processes on Food Labelling
Source: PubMed Central journal article supplement (PMC11549567; doi:10.34172/ijhpm.8310), 2024-10-14
Supplement: ijhpm-13-8310-s003.pdf [file ijhpm-13-8310-s003.pdf]

**Article title:** Understanding the Politics of Food Regulation and Public Health: An Analysis of Codex Standard-Setting Processes on Food Labelling

**Journal name:** International Journal of Health Policy and Management (IJHPM)

**Authors' information:** Monique Boatwright<sup>1\*</sup>, Mark Lawrence<sup>2</sup>, Angela Carriedo<sup>3</sup>, Scott Slater<sup>4</sup>, David McCoy<sup>5</sup>, Tanita Northcott<sup>4</sup>, Phillip Baker<sup>1</sup>

<sup>1</sup>Sydney School of Public Health, Faculty of Medicine and Health, University of Sydney, Sydney, NSW, Australia.

<sup>2</sup>Institute for Physical Activity and Nutrition, School of Exercise and Nutrition Science, Deakin University, Geelong, VIC, Australia.

<sup>3</sup>Department of Health, University of Bath, Bath, UK.

<sup>4</sup>School of Exercise and Nutrition Science, Deakin University, Geelong, VIC, Australia.

<sup>5</sup>International Institute for Global Health, United Nations University, Kuala Lumpur, Malaysia.

**\*Correspondence to:** Monique Boatwright; Email: [monique.boatwright@sydney.edu.au](mailto:monique.boatwright@sydney.edu.au)

**Citation:** Boatwright M, Lawrence M, Carriedo A, et al. Understanding the politics of food regulation and public health: an analysis of Codex standard-setting processes on food labelling. Int J Health Policy Manag. 2024;13:8310.doi:[10.34172/ijhpm.8310](https://doi.org/10.34172/ijhpm.8310)

**Supplementary file 3.** Industry and Civil Society Actors as NGO Observers Listed as Participants Under the Codex Committee on Food Labelling (2016-2023).

**Table S3.** Industry and civil society actors as NGO observers listed as participants under the Codex Committee on Food Labelling (2016-2023).

| Industry actors as NGO observers                                                        | Year of CCFL report          |
|-----------------------------------------------------------------------------------------|------------------------------|
| Alianza Latinoamericana de Asociaciones de la Industria de Alimentos Y Bebidas (ALAIAB) | 2023                         |
| Association of European Coeliac Societies (AOECS)                                       | 2021, 2023                   |
| Calorie Control Council (CCC)                                                           | 2021, 2023                   |
| Comite Europeen Des Fabricants De Sucre (CEFS)                                          | 2021, 2023                   |
| Council for Responsible Nutrition (CRN)                                                 | 2021, 2023                   |
| European Cocoa Association                                                              | 2021                         |
| European Federation of Allergy and Airways Diseases Patients' Associations (EFA)        | 2021, 2023                   |
| Federation Internationale Des Vins Et Spiritueux (FIVS)                                 | 2017, 2019, 2021, 2023       |
| Food Industry Asia (FIA)                                                                | 2017, 2019, 2021, 2023       |
| FoodDrinkEurope                                                                         | 2016, 2017, 2019, 2021, 2023 |
| Global Organization for EPA and DHA Omega-3S (GOED)                                     | 2019                         |
| Good Food Institute (GFI)                                                               | 2021                         |
| Institute of Food Technologists (IFT)                                                   | 2016, 2017, 2019, 2021, 2023 |
| International Alliance of Dietary/Food Supplement Associations (IADSA)                  | 2016, 2021, 2023             |

|                                                                     |                              |
|---------------------------------------------------------------------|------------------------------|
| International Chewing Gum Association (ICGA)                        | 2016, 2017, 2019, 2021, 2023 |
| International Confectionary Association (ICA/IOCCC)                 | 2019, 2021                   |
| International Co-operative Alliance (ICA)                           | 2016, 2017, 2019, 2021, 2023 |
| International Council of Beverages Associations (ICBA)              | 2016, 2017, 2019, 2021, 2023 |
| International Council of Grocery Manufacturers Associations (ICGMA) | 2016, 2017, 2019, 2021, 2023 |
| International Council on Amino Acid Science (ICAAS)                 | 2016, 2017, 2019, 2021       |
| International Dairy Federation (IDF/FIL)                            | 2016, 2017, 2019, 2021, 2023 |
| International Federation of Organic Agriculture Movements (IFOAM)   | 2016                         |
| International Food Additives Council (IFAC)                         | 2016                         |
| International Fruit and Vegetable Juice Association (IFU)           | 2019, 2021, 2023             |
| International Glutamate Technical Committee (IGTC)                  | 2019, 2021                   |
| International Life Sciences (ILSI)                                  | 2016, 2021                   |
| International Meat Secretariat (IMS)                                | 2021                         |
| International Nut and Dried Fruit Council Foundation (INC)          | 2016                         |
| International Organization of the Flavour Industry (IOFI)           | 2016, 2017                   |
| International Special Dietary Foods Industries (ISDI)               | 2017, 2019, 2021, 2023       |
| International Union of Food Science and Technology (IUFOST)         | 2023                         |
| Safe Supply of Affordable Food Everywhere (SSAFE)                   | 2017, 2019, 2021             |
| The European Margarine Association (IMACE)                          | 2021                         |
| World Processing Tomato Council (WPTC)                              | 2021                         |
| <b>CSO actors as NGO observers</b>                                  | <b>Year of CCFL report</b>   |
| International Baby Food Action Network (IBFAN)                      | 2016, 2019, 2021             |
| International Association of Consumer Food Organization (IACFO)     | 2016, 2017, 2021, 2023       |
| Consumers International (CI)                                        | 2019, 2021                   |
| European Network of Childbirth Associations (ENCA)                  | 2019,                        |
| Helen Keller International (HKI)                                    | 2019, 2021                   |
| National Health Federation (NHF)                                    | 2019, 2021                   |
| World Federation of Public Health Associations (WFPHA)              | 2019, 2021                   |
| World Obesity Federation (WOF)                                      | 2019, 2021, 2023             |
| European Federation of the Associations of Dietitians (EFAD)        | 2021                         |
| European Alcohol Policy Alliance (EUROCARE)                         | 2021                         |
| International Lactation Consultant Association (ILCA)               | 2021                         |
| European Network of Childbirth Associations (ENCA)                  | 2023                         |

**Abbreviations:** CCFL, Codex Committee on Food Labelling; CSO, Civil Society Organization; NGO, Non-Governmental Organization.
